# Supplementary material
Source: publisher figshare collection journal article supplement (https://springernature.figshare.com/ndownloader/files/9749602)
Supplement: Supplementary file 1 [file 9749602]

### Legends of the supplementary figures

**Figure S1.** The mRNA secondary structure near the start **codon** AUG predicted using **Centroidfold** algorithm. The mRNA secondary structures of the expressed genes are presented on the left and those of the unexpressed genes on the right. **Green** arrows indicate the first position of the start codon AUG (nt 44-46); black arrows indicate the first position of the SD sequence (nt 29-35). The overall free energy of each secondary structure (kcal/mol) is shown in between brackets.

**Figure S2.** Screen-shots of the Rchange output files of p146, NcoI-E2s, HBsAg-1 and HBsAg-2. The output data are presented as follows: Sequence positions of mutations (mut\_pos1, mut\_pos2) are in 0-based indexing convention. "mutation\_data" is semicolon (;) delimited entries representing different mutations to the original base(s). For each mutation, there are 4 fields delimited by comma ',' representing mutated base(s), entropy change, internal energy change, Helmholtz free energy change.

The data of the mutated position are highlighted in yellow. For, each position, the highest free energy increase induced by a single mutation is highlighted in green while the energy increases induced by the other possible substitutions are highlighted in red.

**Figure S3.** The predicted mRNA secondary structures near the start codons of the mutated p146, NcoI-E2s, HBsAg-1 and HBsAg-2 genes shows that the start codon AUG (**red arrows**) and the SD sequence (black arrows) are exposed from the stable stem-loop structural context.

**Table S1. Amino acid composition of HEV and HBV target proteins**

| AA  | HEV target proteins |      | HBV target proteins |      |
|-----|---------------------|------|---------------------|------|
|     | Avg.                | S.D. | Avg.                | S.D. |
| Phe | 5.00                | 1.41 | 13.67               | 3.51 |
| Leu | 15.88               | 2.75 | 29.33               | 6.03 |
| Ile | 6.00                | 1.41 | 11.00               | 3.00 |
| Val | 15.38               | 1.92 | 9.33                | 0.58 |
| Ser | 18.88               | 2.42 | 20.33               | 5.51 |
| Pro | 11.00               | 2.62 | 20.00               | 4.58 |
| Thr | 20.25               | 1.98 | 15.33               | 4.62 |
| Ala | 16.13               | 3.04 | 5.33                | 1.15 |
| Tyr | 10.38               | 1.30 | 4.00                | 1.00 |
| His | 3.50                | 2.33 | 0.67                | 0.58 |
| Gln | 7.63                | 2.56 | 5.67                | 2.31 |
| Asn | 7.50                | 0.53 | 3.67                | 1.53 |
| Lys | 4.88                | 1.36 | 2.00                | 0.00 |
| Asp | 10.13               | 4.19 | 2.67                | 0.58 |
| Glu | 5.25                | 2.43 | 1.67                | 0.58 |
| Cys | 3.00                | 1.41 | 12.33               | 2.08 |
| Arg | 8.25                | 2.43 | 4.67                | 2.31 |
| Gly | 12.50               | 2.83 | 11.67               | 4.04 |
| Met | 2.75                | 1.39 | 5.67                | 0.58 |
| Trp | 3.00                | 0.00 | 11.67               | 1.53 |

HEV target proteins: p166, p179, p216, p222, p231, p146 and E2s

HBV target proteins: HBsAg-1, HBsAg-2 and HBsAg-3

AA: amino acids

Avg.: average; S.D.: standard deviation

**Table S2. Relative synonymous codon usage (RSCU) in HEV and HBV target genes**

| AA <sup>a</sup> | CODONS     | HEV genes         |                   | HBV genes   |      | AA         | CODONS     | HEV genes    |      | HBV genes    |      |
|-----------------|------------|-------------------|-------------------|-------------|------|------------|------------|--------------|------|--------------|------|
|                 |            | Avg. <sup>b</sup> | S.D. <sup>c</sup> | Avg.        | S.D. |            |            | Avg.         | S.D. | Avg.         | S.D. |
| <b>Phe</b>      | <b>TTT</b> | <b>80.0</b>       | 5.5               | 39.0        | 3.0  | <b>Ala</b> | <b>GCT</b> | <b>55.5</b>  | 4.3  | <b>38.8</b>  | 9.8  |
|                 | <b>TTC</b> | 20.0              | 5.5               | <b>61.0</b> | 3.0  |            | <b>GCC</b> | 25.3         | 2.0  | 19.5         | 4.8  |
| <b>Leu</b>      | <b>TTA</b> | 0.0               | 0.0               | 10.3        | 3.3  |            | <b>GCA</b> | 16.8         | 2.8  | 30.5         | 4.8  |
|                 | <b>TTG</b> | 15.8              | 4.7               | 17.0        | 0.3  |            | <b>GCG</b> | 2.5          | 2.8  | 11.3         | 9.8  |
|                 | <b>CTT</b> | <b>42.5</b>       | 2.2               | 16.5        | 4.5  | <b>Tyr</b> | <b>TAT</b> | <b>64.5</b>  | 2.5  | 44.0         | 21.0 |
|                 | <b>CTC</b> | 14.8              | 1.3               | 15.3        | 5.8  |            | <b>TAC</b> | 35.5         | 2.5  | <b>56.0</b>  | 21.0 |
|                 | <b>CTA</b> | 6.0               | 0.8               | <b>22.7</b> | 0.8  | <b>His</b> | <b>CAT</b> | <b>98.0</b>  | 5.0  | 0.0          | 0.0  |
|                 | <b>CTG</b> | 21.0              | 4.0               | 18.2        | 1.7  |            | <b>CAC</b> | 2.0          | 5.0  | <b>66.5</b>  | 57.5 |
| <b>Ile</b>      | <b>ATT</b> | 37.3              | 4.3               | 28.0        | 9.7  | <b>Gln</b> | <b>CAA</b> | 16.5         | 9.0  | <b>51.0</b>  | 13.5 |
|                 | <b>ATC</b> | <b>61.0</b>       | 4.7               | <b>42.0</b> | 4.0  |            | <b>CAG</b> | <b>84.0</b>  | 9.0  | 49.0         | 13.5 |
|                 | <b>ATA</b> | 2.0               | 4.3               | 30.0        | 5.7  | <b>Asn</b> | <b>AAT</b> | <b>87.0</b>  | 1.0  | 45.0         | 39.5 |
| <b>Val</b>      | <b>GTT</b> | <b>48.3</b>       | 3.5               | <b>43.0</b> | 2.5  |            | <b>AAC</b> | 13.0         | 1.0  | <b>55.0</b>  | 39.5 |
|                 | <b>GTC</b> | 25.8              | 3.0               | 21.5        | 1.3  | <b>Lys</b> | <b>AAA</b> | 30.0         | 10.0 | <b>50.0</b>  | 0.0  |
|                 | <b>GTA</b> | 6.3               | 0.5               | 17.8        | 6.0  |            | <b>AAG</b> | <b>70.0</b>  | 10.0 | <b>50.0</b>  | 0.0  |
|                 | <b>GTG</b> | 20.0              | 4.3               | 17.8        | 6.0  | <b>Asp</b> | <b>GAT</b> | <b>70.0</b>  | 8.0  | 0.0          | 0.0  |
|                 |            |                   |                   |             |      |            | <b>GAC</b> | 30.0         | 8.0  | <b>100.0</b> | 0.0  |
| <b>Ser</b>      | <b>TCT</b> | <b>61.0</b>       | 7.8               | 16.2        | 1.5  | <b>Glu</b> | <b>GAA</b> | 0.0          | 0.0  | 0.0          | 0.0  |
|                 | <b>TCC</b> | 17.8              | 2.2               | 21.3        | 0.5  |            | <b>GAG</b> | <b>100.0</b> | 0.0  | <b>100.0</b> | 0.0  |
|                 | <b>TCA</b> | 6.8               | 2.7               | <b>26.5</b> | 1.8  | <b>Cys</b> | <b>TGT</b> | 42.5         | 10.0 | <b>58.5</b>  | 7.5  |
|                 | <b>TCG</b> | 5.2               | 0.5               | 10.8        | 3.2  |            | <b>TGC</b> | <b>57.5</b>  | 10.0 | 41.5         | 7.5  |
|                 | <b>AGT</b> | 5.2               | 0.5               | 22.2        | 5.7  | <b>Arg</b> | <b>CGT</b> | 38.3         | 7.2  | <b>38.8</b>  | 9.7  |
|                 | <b>AGC</b> | 4.2               | 10.2              | 2.8         | 2.5  |            | <b>CGC</b> | <b>43.8</b>  | 6.2  | 11.2         | 9.7  |
| <b>Pro</b>      | <b>CCT</b> | <b>67.3</b>       | 2.0               | 28.3        | 1.3  |            | <b>CGA</b> | 3.0          | 4.8  | 0.0          | 0.0  |
|                 | <b>CCC</b> | 13.3              | 6.5               | 30.3        | 2.5  |            | <b>CGG</b> | 14.7         | 3.0  | 11.2         | 9.7  |
|                 | <b>CCA</b> | 18.0              | 3.0               | <b>41.5</b> | 1.5  |            | <b>AGA</b> | 0.0          | 0.0  | <b>38.8</b>  | 9.7  |
|                 | <b>CCG</b> | 1.8               | 4.5               | 0.0         | 0.0  |            | <b>AGG</b> | 0.0          | 0.0  | 0.0          | 0.0  |
| <b>Thr</b>      | <b>ACT</b> | <b>80.3</b>       | 2.3               | 24.8        | 4.5  | <b>Gly</b> | <b>GGT</b> | 30.0         | 1.8  | 9.5          | 4.0  |
|                 | <b>ACC</b> | 10.3              | 2.8               | <b>28.5</b> | 1.3  |            | <b>GGC</b> | <b>41.3</b>  | 1.3  | 9.5          | 8.3  |
|                 | <b>ACA</b> | 4.8               | 0.5               | <b>28.8</b> | 7.8  |            | <b>GGA</b> | 2.0          | 4.8  | <b>52.5</b>  | 4.3  |
|                 | <b>ACG</b> | 4.8               | 0.5               | 17.8        | 2.0  |            | <b>GGG</b> | 27.0         | 4.8  | 28.5         | 0.0  |

The values are expressed as percentage

The preferentially used codons for each amino acid are indicated in bold.

<sup>a</sup> amino acids; <sup>b</sup> Average; <sup>c</sup> standard deviation.

**Table S3.**

| <b>Genes</b>                | <b>Sequences of the -43/ATG/+43 mRNA segments</b>                                                       |
|-----------------------------|---------------------------------------------------------------------------------------------------------|
| <b>NcoI-E2s</b>             | CCUCUAGAAAUAUUUUUGUUUAAACUUUAAGAAGGAG<br>AUAUACC AUG UCCCCUGCUCCUUCUCGCCC UUUUCU<br>GUGCUUCGUGCUAAUG    |
| <b>Mutated<br/>NcoI-E2s</b> | CCUCUAGAAAUAUUUUUGUUUAAACUUUAAGAAGGAG<br>AUAUACC AUG UCCCCUG AU GA UUCUCGCCC UUUUCU<br>GUGCUUCGUGCUAAUG |
| <b>p146</b>                 | CCUCUAGAAAUAUUUUUGUUUAAACUUUAAGAAGGAG<br>AUAUACC AUG GCUCCUUCUCGCCC UUUUCUGUGCUU<br>CGUGCUAAUGAUGUGC    |
| <b>Mutated<br/>p146</b>     | CCUCUAGAAAUAUUUUUGUUUAAACUUUAAGAAGGAG<br>AUAUACC AUG GA UUCUCGCCC UUUUCUGUGCU<br>UCGUGCUAAUGAUGUGC      |
| <b>HBsAg-1</b>              | CCUCUAGAAAUAUUUUUGUUUAAACUUUAAGAAGGAG<br>AUAUACC AUG GAGAGCACAACAUCAGGAUCCUAGG<br>ACCCUGCUCGUGUUAC      |
| <b>Mutated<br/>HBsAg-1</b>  | CCUCUAGAAAUAUUUUUGUUUAAACUUUAAGAAGGAG<br>AUAUACC AUG GAGAGCACAACAUCAG AT UCCUAGGA<br>CCCCUGCUCGUGUUAC   |
| <b>HBsAg-2</b>              | CCUCUAGAAAUAUUUUUGUUUAAACUUUAAGAAGGAG<br>AUAUACC AUG GCUCUGCUGCUAUGCCUCAUCUUCUUG<br>UUGGUUCUUCUGGACU    |
| <b>Mutated<br/>HBsAg-2</b>  | CCTCTAGAAATAATTTTGTTTAACTTTAAGAAGGAGAT<br>ATACC ATG GCTCTGCT T CT GTGCCTCATCTTCTTGTG<br>TTCTTCTGGACT    |

The SD sequences are highlighted in green

The start codons are highlighted in yellow

The substitutions in the mutated genes are highlighted in cyan
